# Supplementary material for: Trunk Fat Estimation According To Gender In Childhood Through Basic Somatic Readings. An Opportunity for Improving Girl’S Evaluation
Source: Research Square preprint supplement (doi:10.21203/rs.3.rs-551261/v1), 2021-05-26
Supplement: Supplementary file 1 [file 4cfc67160c95c7268c45dc35.docx]

Consent for Publication

Manuel Moya author of the manuscript ‘TRUNK FAT ESTIMATION ACCORDING TO GENDER IN CHILDHOOD THROUGH BASIC SOMATIC READINGS. An opportunity for improving girl’s evaluation’, gives full consent to WJP for its publication.

In agreement with this statement, I signed it on the 30th March 2021


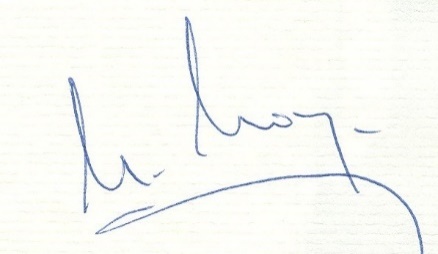


Manuel Moya

19359010W

Virginia Pérez-Fernández co-author of the manuscript ‘TRUNK FAT ESTIMATION ACCORDING TO GENDER IN CHILDHOOD THROUGH BASIC SOMATIC READINGS. An opportunity for improving girl’s evaluation’, gives full consent to WJP for its publication.

In agreement with this statement, I signed it on the 04 March 2021

PEREZ Digital signature of

FERNANDEZ PEREZ FERNANDEZ

VIRGINIA VIRGINIA- 34835975Z

34835975z Date: 2021. 03. 04

11:01: 24 +01’00’
